# Supplementary material for: In situ microfluidic SERS assay for monitoring enzymatic breakdown of organophosphates
Source: Royal Society of Chemistry journal article supplement (doi:10.1039/c5nr01974e), 2015-01-01
Supplement: c5nr01974e1.pdf [file c5nr01974e1.pdf]

**Supplemental Information to manuscript titled “In-situ microfluidic SERS assay  
for monitoring enzymatic breakdown of organophosphates”**

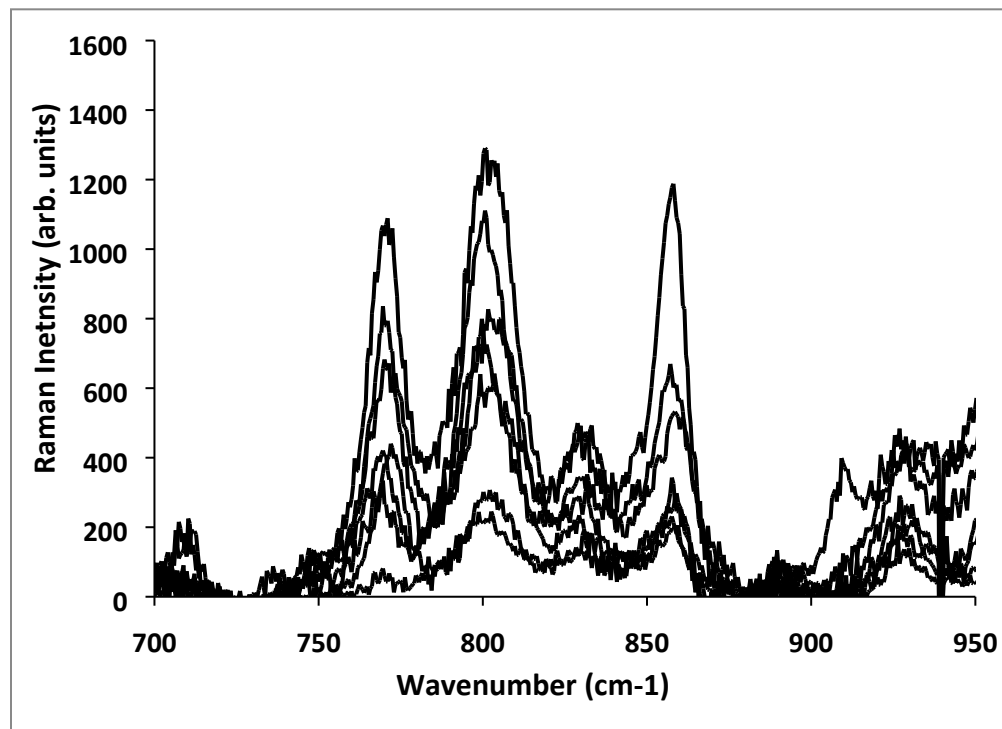

**Figure S1. A series of Raman spectra from the same SERS cluster, showing reproducibility of spectral features of adsorbed citrate species.**

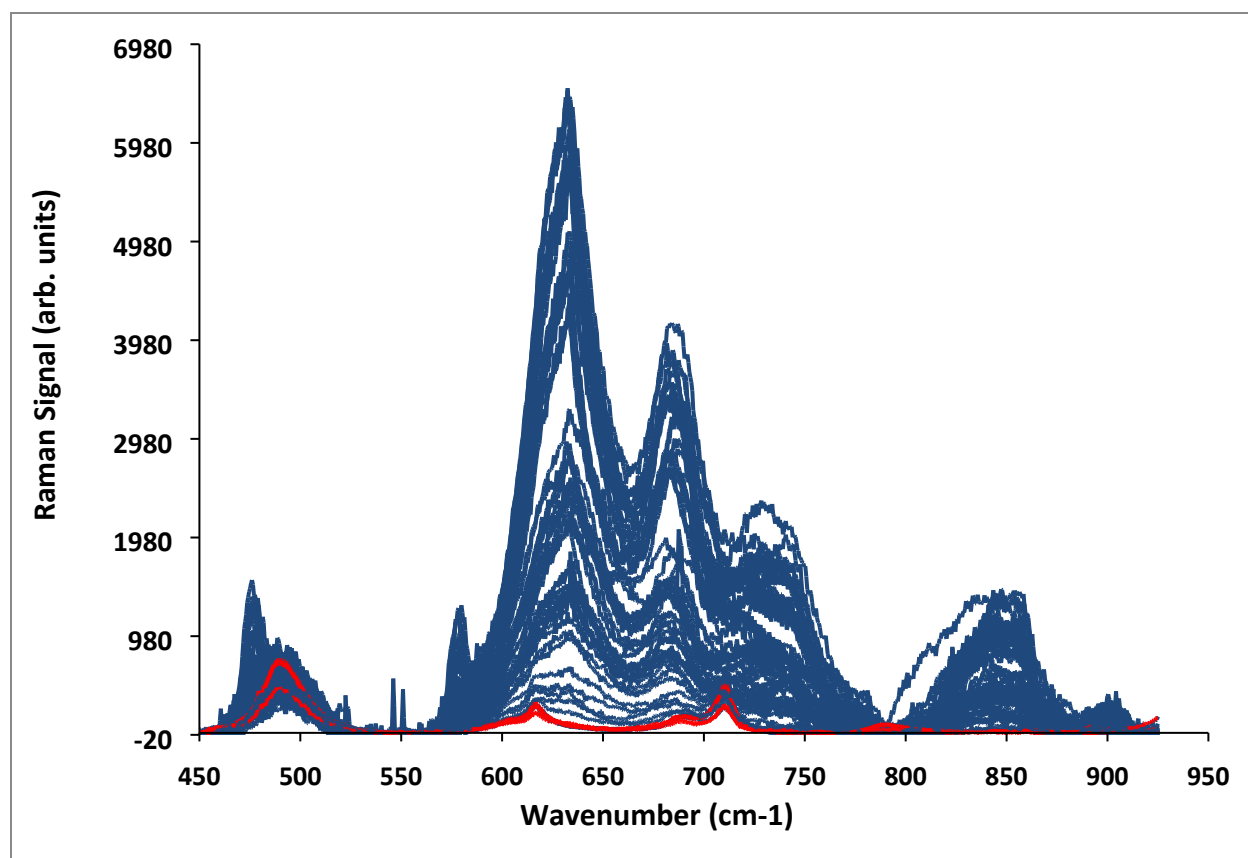

Figure S2. SERS spectra from a 2-EET-functionalized Ag cluster, corresponding to a Raman spatial map of Figure 5F. The blue peaks refer to the peaks inside the Ag cluster, corresponding to 2-EET. The red peaks are from areas outside of the cluster, representing PDMS background from the microchannel.
